# Supplementary material for: Association between Obesity and Circulating Brain-Derived Neurotrophic Factor (BDNF) Levels: Systematic Review of Literature and Meta-Analysis
Source: MDPI journal article supplement (doi:10.3390/ijms19082281), 2018-08-03
Supplement: s1 [file s1]

Table S1: Demographic and clinical data of obese patients and healthy controls of the included studies.

| Author,<br>Country                     | TC<br>(mg/dl) | TC<br>(mg/dl)<br>CTRLs | TC<br>(mg/dl)<br>Weighted<br>average | HDL<br>(mg/dl) | HDL<br>(mg/dl)<br>CTRLs | HDL<br>(mg/dl)<br>Weighted<br>average | LDL<br>(mg/dl) | LDL<br>(mg/dl)<br>CTRLs | LDL<br>(mg/dl)<br>Weighted<br>average | TG<br>(mg/dl) | TG<br>(mg/dl)<br>CTRLs | TG<br>(mg/dl)<br>Weighted<br>average | Glycaemia<br>(mg/dl) | Glycaemia<br>(mg/dl)<br>CTRLs | Glycaemia<br>(mg/dl)<br>Weighted<br>average |
|----------------------------------------|---------------|------------------------|--------------------------------------|----------------|-------------------------|---------------------------------------|----------------|-------------------------|---------------------------------------|---------------|------------------------|--------------------------------------|----------------------|-------------------------------|---------------------------------------------|
| Lee I-Te<br>2016, Taiwan               | 201           | 186                    | 195                                  | 39             | 54                      | 45                                    | ND             | ND                      | ND                                    | 283           | 97                     | 207                                  | 101                  | 90                            | 96                                          |
| Slusher AL<br>2015, United States      | ND            | ND                     | ND                                   | ND             | ND                      | ND                                    | ND             | ND                      | ND                                    | ND            | ND                     | ND                                   | 98                   | 89                            | 94                                          |
| Hinderberger P<br>2016, Germany        | ND            | ND                     | ND                                   | ND             | ND                      | ND                                    | ND             | ND                      | ND                                    | ND            | ND                     | ND                                   | ND                   | ND                            | ND                                          |
| Gajewska E<br>2014, Poland             | 205,7         | 246,6                  | 223                                  | 45,2           | 45,4                    | 45,3                                  | 127,8          | 158,4                   | 140,7                                 | 162,9         | 221,6                  | 188                                  | 107,5                | 93,2                          | 101                                         |
|                                        | 233,8         | 232,6                  | 233,3                                | 39,2           | 49,3                    | 43,1                                  | 158            | 151                     | 155,3                                 | 183,2         | 160                    | 174                                  | 104,8                | 99                            | 103                                         |
|                                        | 216,1         | 172,2                  | 199,9                                | 34,4           | 41,2                    | 36,9                                  | 139,2          | 103,2                   | 125,9                                 | 139,2         | 139                    | 139                                  | 101                  | 97,8                          | 100                                         |
|                                        | 220,8         | 208                    | 213,1                                | 35,5           | 43,8                    | 40,5                                  | 144,7          | 132,8                   | 137,6                                 | 164,8         | 153,7                  | 158                                  | 96,9                 | 92,4                          | 94                                          |
| Han JC<br>2010, United States          | ND            | ND                     | ND                                   | ND             | ND                      | ND                                    | ND             | ND                      | ND                                    | ND            | ND                     | ND                                   | ND                   | ND                            | ND                                          |
| Corripio R<br>2012, Spain              | 155,5         | 157,8                  | 156                                  | 51,3           | 65,5                    | 57                                    | 93,5           | 82,6                    | 89                                    | ND            | ND                     | ND                                   | 83,7                 | 83,3                          | 84                                          |
| Lee I-Te<br>2012, Taiwan               | 201           | 186                    | 195                                  | 39             | 54                      | 45                                    | ND             | ND                      | ND                                    | 213           | 97                     | 165                                  | 97                   | 90                            | 94                                          |
| Lee SS<br>2014, Korea                  | ND            | ND                     | ND                                   | ND             | ND                      | ND                                    | ND             | ND                      | ND                                    | ND            | ND                     | ND                                   | ND                   | ND                            | ND                                          |
| Levinger I<br>2007, Australia          | ND            | ND                     | ND                                   | 54             | 62                      | 57                                    | ND             | ND                      | ND                                    | 124           | 62                     | 98                                   | 86                   | 101                           | 92                                          |
| Chun-Jung Huang<br>2013, United States | ND            | ND                     | ND                                   | ND             | ND                      | ND                                    | ND             | ND                      | ND                                    | ND            | ND                     | ND                                   | ND                   | ND                            | ND                                          |

TC: Total cholesterol, HDL: High density lipoproteins, LDL: Low density lipoproteins, TG: Triglycerides, ND: Not Declared
