# Supplementary figures and images for: Association between Obesity and Circulating Brain-Derived Neurotrophic Factor (BDNF) Levels: Systematic Review of Literature and Meta-Analysis
Source: MDPI journal article supplement (doi:10.3390/ijms19082281), 2018-08-03

S2 Fig. Scatterplot of the relationship between male gender and age and mean difference.

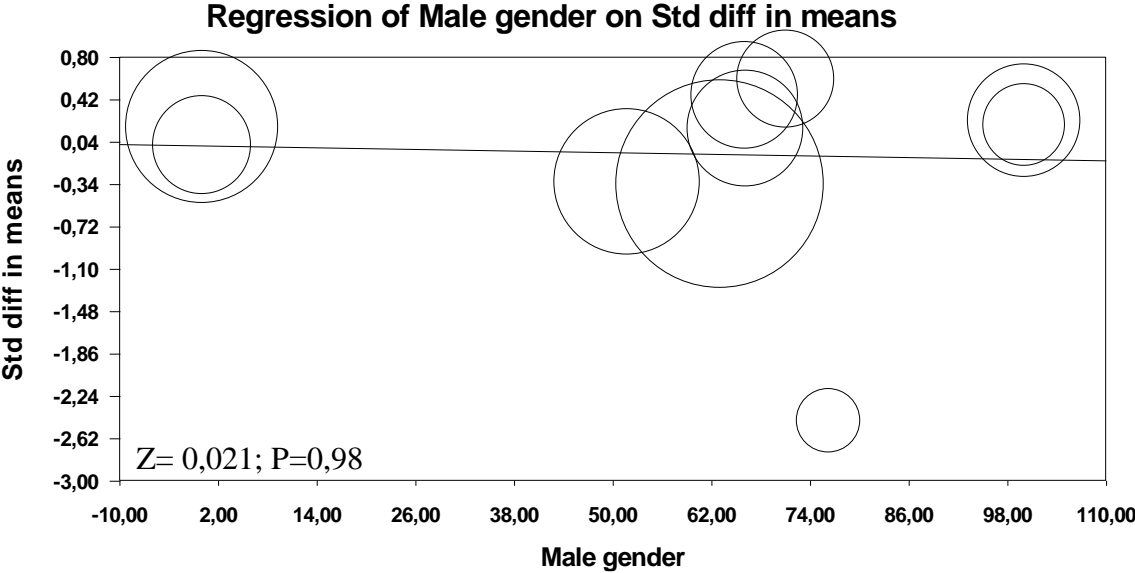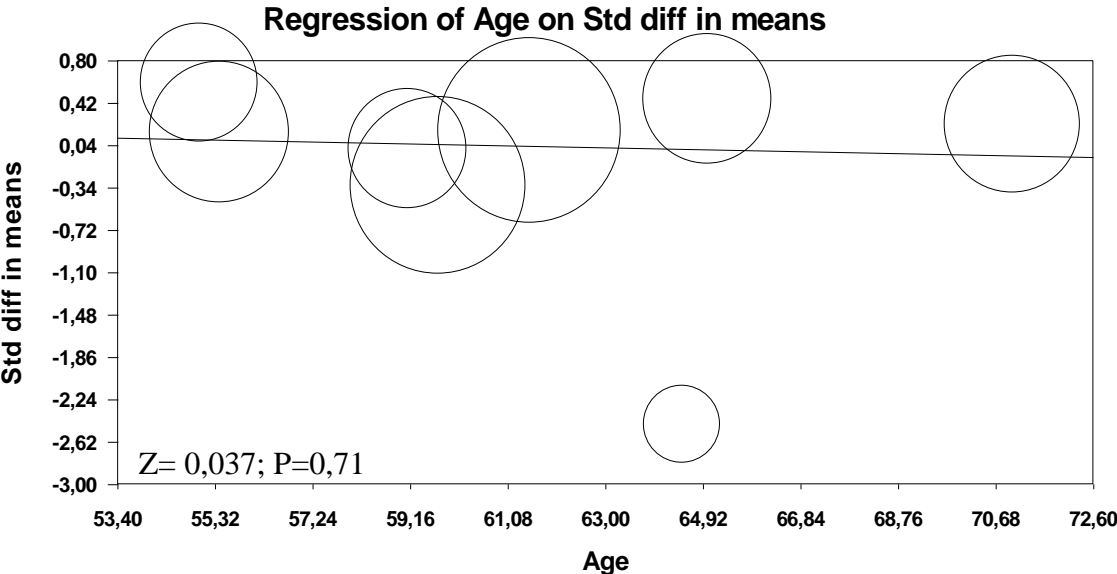

Supplement: s1 [file s1]
